# Supplementary material for: Synthesis and properties of pyrrolo[3,2-b]pyrrole-1,4-diones (isoDPP) derivatives
Source: Royal Society of Chemistry journal article supplement (doi:10.1039/c4tc00427b), 2014-01-01
Supplement: c4tc00427b1.pdf [file c4tc00427b1.pdf]

## SUPPLEMENTARY INFORMATION

### Synthesis and properties of pyrrolo[3,2-*b*]pyrrole-1,4-diones (isoDPP) derivatives

David Gendron,<sup>a</sup> Eliot Gann,<sup>b</sup> Katherine Pattison,<sup>c</sup> Fatemeh Maasoumi,<sup>a</sup> Christopher R. McNeill,<sup>b</sup> Scott E. Watkins,<sup>d</sup> Paul L. Burn,<sup>a\*</sup> Benjamin J. Powell,<sup>c</sup> Paul E. Shaw<sup>a</sup>

<sup>a</sup> Centre for Organic Photonics & Electronics, School of Chemistry and Molecular Biosciences, The University of Queensland, St Lucia, QLD 4072, Australia.

<sup>b</sup> Department of Materials Engineering, Monash University, Clayton Campus, Wellington Road, Clayton, VIC 3800, Australia

<sup>c</sup> Centre for Organic Photonics & Electronics, School of Mathematics and Physics, The University of Queensland, St Lucia, QLD 4072, Australia.

<sup>d</sup> CSIRO Molecular Health Technologies, VIC 3169, Australia

E-mail: p.burn2@uq.edu.au

## Kohn-Sham molecular orbital energies

### Compound 2

| Molecular Orbital | Symmetry       | Energy (eV) |
|-------------------|----------------|-------------|
| HOMO-3            | A <sub>u</sub> | -6.906      |
| HOMO-2            | A <sub>g</sub> | -6.870      |
| HOMO-1            | A <sub>g</sub> | -6.198      |
| HOMO              | A <sub>u</sub> | -6.100      |
| LUMO              | A <sub>u</sub> | -2.650      |
| LUMO+1            | A <sub>u</sub> | -0.752      |
| LUMO+2            | A <sub>g</sub> | -0.736      |
| LUMO+3            | A <sub>g</sub> | -0.653      |

### Compound 3

| Molecular Orbital | Symmetry       | Energy (eV) |
|-------------------|----------------|-------------|
| HOMO-3            | A <sub>g</sub> | -6.725      |
| HOMO-2            | A <sub>u</sub> | -6.707      |
| HOMO-1            | A <sub>u</sub> | -5.933      |
| HOMO              | A <sub>g</sub> | -5.875      |
| LUMO              | A <sub>u</sub> | -2.708      |
| LUMO+1            | A <sub>u</sub> | -0.763      |
| LUMO+2            | A <sub>g</sub> | -0.713      |
| LUMO+3            | A <sub>g</sub> | -0.663      |

### Compound 7

| Molecular Orbital | Symmetry       | Energy (eV) |
|-------------------|----------------|-------------|
| HOMO-3            | A <sub>u</sub> | -6.072      |
| HOMO-2            | A <sub>g</sub> | -6.065      |
| HOMO-1            | A <sub>g</sub> | -5.947      |
| HOMO              | A <sub>u</sub> | -5.710      |
| LUMO              | A <sub>u</sub> | -2.579      |
| LUMO+1            | A <sub>g</sub> | -0.561      |
| LUMO+2            | A <sub>u</sub> | -0.538      |
| LUMO+3            | A <sub>u</sub> | -0.265      |

## Excitation energies form TDDFT

### Compound 2

|                 | Symmetry       | Energy (eV) | f (a.u.)  | Largest molecular orbital contributions                            |
|-----------------|----------------|-------------|-----------|--------------------------------------------------------------------|
| S <sub>1</sub>  | A <sub>g</sub> | 2.71766     | 0         | HOMO → LUMO (98 %), HOMO-5 → LUMO (0.4 %), HOMO → LUMO+6 (0.3 %)   |
| S <sub>2</sub>  | A <sub>u</sub> | 3.24079     | 0.37940   | HOMO-1 → LUMO (86 %), HOMO-2 → LUMO (6 %), HOMO-4 → LUMO (5 %)     |
| S <sub>3</sub>  | A <sub>u</sub> | 3.57964     | 0.077534  | HOMO-2 → LUMO (77%), HOMO-8 → LUMO (12%), HOMO-1 → LUMO (6%)       |
| S <sub>4</sub>  | A <sub>g</sub> | 3.65915     | 0         | HOMO-3 → LUMO (98%), HOMO-11 → LUMO (0.3%), HOMO-1 → LUMO+8 (0.2%) |
| S <sub>5</sub>  | A <sub>u</sub> | 3.84565     | 0.0065232 | HOMO-8 → LUMO (39%), HOMO-4 → LUMO (32%), HOMO-7 → LUMO (13%)      |
| S <sub>6</sub>  | A <sub>u</sub> | 3.99465     | 0.052762  | HOMO-4 → LUMO (58%), HOMO-7 → LUMO (21%), HOMO-8 → LUMO (14%)      |
| S <sub>7</sub>  | A <sub>g</sub> | 4.00528     | 0         | HOMO-5 → LUMO (86%), HOMO-6 → LUMO (8%), HOMO-9 → LUMO (2%)        |
| S <sub>8</sub>  | A <sub>g</sub> | 4.06003     | 0         | HOMO-6 → LUMO (69%), HOMO-5 → LUMO (12%), HOMO-9 → LUMO (9%)       |
| S <sub>9</sub>  | A <sub>u</sub> | 4.20508     | 0.019059  | HOMO-7 → LUMO (63%), HOMO-8 → LUMO (33%), HOMO-4 → LUMO (2%)       |
| S <sub>10</sub> | A <sub>g</sub> | 4.30224     | 0         | HOMO-9 → LUMO (56%), HOMO-6 → LUMO (21%), HOMO-11 → LUMO (20%)     |

|                 | Symmetry       | Energy (eV) | f (a.u.) | Largest molecular orbital contributions                          |
|-----------------|----------------|-------------|----------|------------------------------------------------------------------|
| T <sub>1</sub>  | A <sub>u</sub> | 2.1681      | 0        | HOMO-1 → LUMO (92 %), HOMO-10 → LUMO (4 %), HOMO-4 → LUMO (1 %)  |
| T <sub>2</sub>  | A <sub>g</sub> | 2.203       | 0        | HOMO → LUMO (96 %), HOMO-9 → LUMO (1%), HOMO-1 → LUMO+5 (0.6 %)  |
| T <sub>3</sub>  | A <sub>u</sub> | 3.3085      | 0        | HOMO-2 → LUMO (56%), HOMO-8 → LUMO (23%), HOMO-4 → LUMO (11%)    |
| T <sub>4</sub>  | A <sub>g</sub> | 3.5096      | 0        | HOMO-3 → LUMO (90%), HOMO-6 → LUMO (2%), HOMO-9 → LUMO (2%)      |
| T <sub>5</sub>  | A <sub>u</sub> | 3.6345      | 0        | HOMO-2 → LUMO (37%), HOMO-4 → LUMO (34%), HOMO-7 → LUMO (13%)    |
| T <sub>6</sub>  | A <sub>u</sub> | 3.6718      | 0        | HOMO-8 → LUMO (35%), HOMO-4 → LUMO (30%), HOMO-10 → LUMO (12%)   |
| T <sub>7</sub>  | A <sub>g</sub> | 3.7234      | 0        | HOMO-5 → LUMO (68%), HOMO-1 → LUMO+5 (9%), HOMO → LUMO+5 (3%)    |
| T <sub>8</sub>  | A <sub>g</sub> | 3.85        | 0        | HOMO-9 → LUMO (32%), HOMO-6 → LUMO (31%), HOMO-11 → LUMO (28%)   |
| T <sub>9</sub>  | A <sub>u</sub> | 4.0009      | 0        | HOMO-4 → LUMO (17%), HOMO → LUMO+5 (13%), HOMO-10 → LUMO (13%)   |
| T <sub>10</sub> | A <sub>g</sub> | 4.0283      | 0        | HOMO → LUMO+1 (24%), HOMO-4 → LUMO+2 (14%), HOMO-6 → LUMO+4 (9%) |

Compound 3

|                 | Symmetry       | Energy (eV) | f (a.u.) | Largest molecular orbital contributions                            |
|-----------------|----------------|-------------|----------|--------------------------------------------------------------------|
| S <sub>1</sub>  | A <sub>g</sub> | 2.5881      | 0        | HOMO-1 → LUMO (97 %), HOMO-5 → LUMO (0.6 %), HOMO-9 → LUMO (0.4 %) |
| S <sub>2</sub>  | A <sub>u</sub> | 2.9067      | 4.41E-01 | HOMO → LUMO (93 %), HOMO-3 → LUMO (2 %), HOMO-4 → LUMO (2 %)       |
| S <sub>3</sub>  | A <sub>g</sub> | 3.4161      | 0        | HOMO-2 → LUMO (99%), HOMO-1 → LUMO (0.2%), HOMO-11 → LUMO (0.1%)   |
| S <sub>4</sub>  | A <sub>u</sub> | 3.4411      | 6.49E-02 | HOMO-3 → LUMO (93%), HOMO-8 → LUMO (3%), HOMO → LUMO (2%)          |
| S <sub>5</sub>  | A <sub>u</sub> | 3.7464      | 5.19E-03 | HOMO-8 → LUMO (39%), HOMO-4 → LUMO (33%), HOMO-7 → LUMO (23%)      |
| S <sub>6</sub>  | A <sub>u</sub> | 3.9112      | 2.75E-02 | HOMO-4 → LUMO (61%), HOMO-7 → LUMO (22%), HOMO-8 → LUMO (14%)      |
| S <sub>7</sub>  | A <sub>g</sub> | 3.9172      | 0        | HOMO-5 → LUMO (97%), HOMO-6 → LUMO (0.7%), HOMO-1 → LUMO (0.5%)    |
| S <sub>8</sub>  | A <sub>g</sub> | 3.9949      | 0        | HOMO-6 → LUMO (87%), HOMO-11 → LUMO (8%), HOMO-9 → LUMO (4%)       |
| S <sub>9</sub>  | A <sub>u</sub> | 4.1229      | 8.84E-03 | HOMO-7 → LUMO (55%), HOMO-8 → LUMO (43%), HOMO-4 → LUMO (1%)       |
| S <sub>10</sub> | A <sub>g</sub> | 4.2528      | 0        | HOMO-9 → LUMO (51%), HOMO-11 → LUMO (35%), HOMO-6 → LUMO (11%)     |

|                 | Symmetry       | Energy (eV) | f (a.u.) | Largest molecular orbital contributions                             |
|-----------------|----------------|-------------|----------|---------------------------------------------------------------------|
| T <sub>1</sub>  | A <sub>u</sub> | 1.90655     | 0        | HOMO → LUMO (93 %), HOMO-10 → LUMO (2 %), HOMO-3 → LUMO (0.8 %)     |
| T <sub>2</sub>  | A <sub>g</sub> | 2.02993     | 0        | HOMO-1 → LUMO (96 %), HOMO-9 → LUMO (1%), HOMO → LUMO+3 (0.6 %)     |
| T <sub>3</sub>  | A <sub>u</sub> | 3.1779      | 0        | HOMO-3 → LUMO (89 %), HOMO-8 → LUMO (5 %), HOMO-4 → LUMO (1 %)      |
| T <sub>4</sub>  | A <sub>g</sub> | 3.20334     | 0        | HOMO-2 → LUMO (95%), HOMO-3 → LUMO+5 (0.9%), HOMO-3 → LUMO+3 (0.8%) |
| T <sub>5</sub>  | A <sub>u</sub> | 3.43211     | 0        | HOMO-4 → LUMO (39%), HOMO-8 → LUMO (22%), HOMO-7 → LUMO (17%)       |
| T <sub>6</sub>  | A <sub>g</sub> | 3.50326     | 0        | HOMO-5 → LUMO (47%), HOMO → LUMO+3 (9%), HOMO → LUMO+5 (9%)         |
| T <sub>7</sub>  | A <sub>u</sub> | 3.58024     | 0        | HOMO-8 → LUMO (34%), HOMO-10 → LUMO (19%), HOMO-4 → LUMO (10%)      |
| T <sub>8</sub>  | A <sub>u</sub> | 3.81089     | 0        | HOMO-4 → LUMO (36%), HOMO → LUMO+6 (15%), HOMO-1 → LUMO+3 (9%)      |
| T <sub>9</sub>  | A <sub>g</sub> | 3.83866     | 0        | HOMO-6 → LUMO (37%), HOMO-11 → LUMO (36%), HOMO-9 → LUMO (20%)      |
| T <sub>10</sub> | A <sub>g</sub> | 3.88209     | 0        | HOMO-5 → LUMO (40%), HOMO → LUMO+3 (12%), HOMO → LUMO+2 (10%)       |

## Compound 7

|                 | Symmetry       | Energy (eV) | f (a.u.) | Largest molecular orbital contributions                           |
|-----------------|----------------|-------------|----------|-------------------------------------------------------------------|
| S <sub>1</sub>  | A <sub>g</sub> | 2.45272     | 0        | HOMO → LUMO (98 %), HOMO-13 → LUMO (0.5 %), HOMO-5 → LUMO (0.3 %) |
| S <sub>2</sub>  | A <sub>u</sub> | 2.86395     | 4.50E-02 | HOMO-2 → LUMO (60%), HOMO-1 → LUMO (39 %), HOMO-4 → LUMO (0.9 %)  |
| S <sub>3</sub>  | A <sub>g</sub> | 2.90833     | 0        | HOMO-3 → LUMO (99%), HOMO → LUMO (0.3%), HOMO-5 → LUMO (0.1%)     |
| S <sub>4</sub>  | A <sub>u</sub> | 3.06083     | 1.28E-02 | HOMO-4 → LUMO (82%), HOMO-2 → LUMO (10%), HOMO-1 → LUMO (6%)      |
| S <sub>5</sub>  | A <sub>u</sub> | 3.25786     | 5.01E-01 | HOMO-1 → LUMO (52%), HOMO-2 → LUMO (29%), HOMO-4 → LUMO (15%)     |
| S <sub>6</sub>  | A <sub>g</sub> | 3.40255     | 0        | HOMO-5 → LUMO (98%), HOMO → LUMO (0.4%), HOMO-9 → LUMO (0.4%)     |
| S <sub>7</sub>  | A <sub>u</sub> | 3.48479     | 6.91E-04 | HOMO-6 → LUMO (94%), HOMO-8 → LUMO (2%), HOMO-4 → LUMO (2%)       |
| S <sub>8</sub>  | A <sub>g</sub> | 3.77644     | 0        | HOMO-7 → LUMO (61%), HOMO-9 → LUMO (36%), HOMO-15 → LUMO (1%)     |
| S <sub>9</sub>  | A <sub>u</sub> | 4.09238     | 9.85E-03 | HOMO-8 → LUMO (97%), HOMO-6 → LUMO (2%), HOMO-12 → LUMO (0.2%)    |
| S <sub>10</sub> | A <sub>g</sub> | 4.11606     | 0        | HOMO-9 → LUMO (62%), HOMO-7 → LUMO (38%), HOMO-15 → LUMO (0.2%)   |

|                 | Symmetry       | Energy (eV) | f (a.u.) | Largest molecular orbital contributions                          |
|-----------------|----------------|-------------|----------|------------------------------------------------------------------|
| T <sub>1</sub>  | A <sub>g</sub> | 2.01668     | 0        | HOMO → LUMO (89%), HOMO-5 → LUMO (7%) HOMO-3 → LUMO (1%)         |
| T <sub>2</sub>  | A <sub>u</sub> | 2.02813     | 0        | HOMO-1 → LUMO (69%), HOMO-2 → LUMO (21%), HOMO-4 → LUMO (5%)     |
| T <sub>3</sub>  | A <sub>u</sub> | 2.66682     | 0        | HOMO-2 → LUMO (69%), HOMO-1 → LUMO (26%), HOMO-4 → LUMO (3%)     |
| T <sub>4</sub>  | A <sub>g</sub> | 2.6892      | 0        | HOMO-3 → LUMO (92%), HOMO → LUMO (3%), HOMO-5 → LUMO (3%)        |
| T <sub>5</sub>  | A <sub>u</sub> | 3.00231     | 0        | HOMO-4 → LUMO (82%), HOMO-6 → LUMO (8%), HOMO-2 → LUMO (7%)      |
| T <sub>6</sub>  | A <sub>g</sub> | 3.24481     | 0        | HOMO-5 → LUMO (87%), HOMO → LUMO (6%), HOMO-3 → LUMO (4%)        |
| T <sub>7</sub>  | A <sub>u</sub> | 3.2673      | 0        | HOMO-6 → LUMO (84%), HOMO-4 → LUMO (9%), HOMO-8 → LUMO (2%)      |
| T <sub>8</sub>  | A <sub>g</sub> | 3.56249     | 0        | HOMO-7 → LUMO (47%), HOMO-9 → LUMO (46%), HOMO-15 → LUMO (3%)    |
| T <sub>9</sub>  | A <sub>u</sub> | 3.82754     | 0        | HOMO-4 → LUMO+4 (22%), HOMO → LUMO+3 (22%), HOMO-5 → LUMO+3 (8%) |
| T <sub>10</sub> | A <sub>g</sub> | 3.83267     | 0        | HOMO → LUMO+4 (24%), HOMO-4 → LUMO+4 (22%), HOMO-5 → LUMO+4 (9%) |

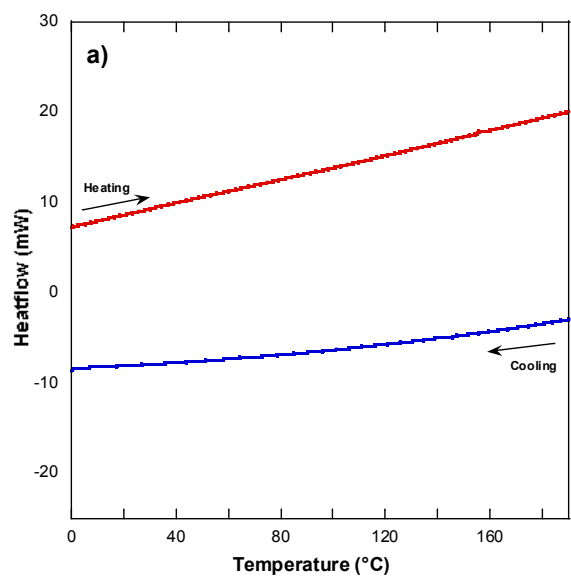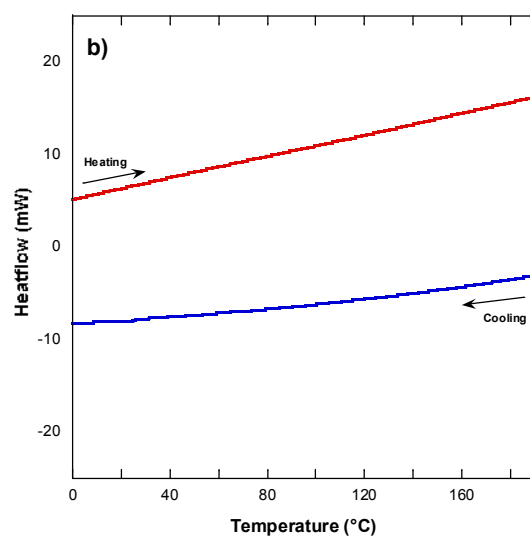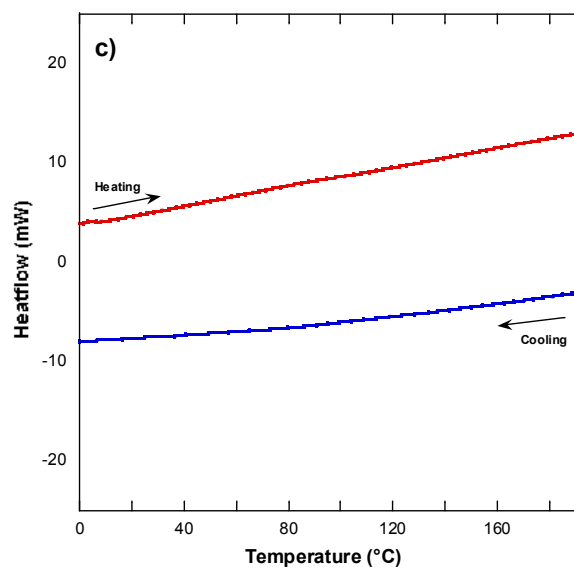

S1. DSC thermograms of a) 2, b) 3 and c) 7.
